# Supplementary material for: Entropy Analysis of COVID-19 Cardiovascular Signals
Source: Entropy (Basel). 2021 Jan 9;23(1):87. doi: 10.3390/e23010087 (PMC7826611; doi:10.3390/e23010087)

# COVID-19 SIGNALS

First panel: RRI time series

Second panel: SBP time series

The axis lengths for all signals are equal.

If COP and JSDSh parameters are missing, then SBP signal is not eligible for processing (too many interrupts).

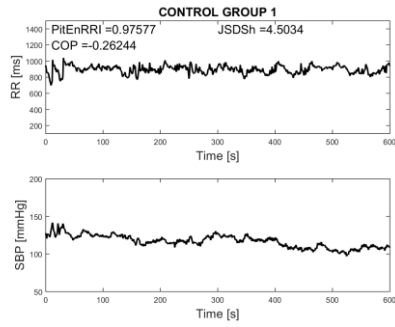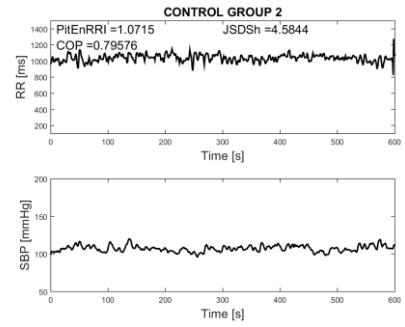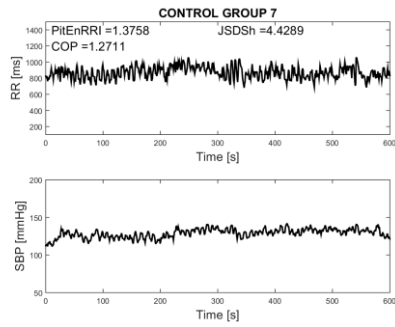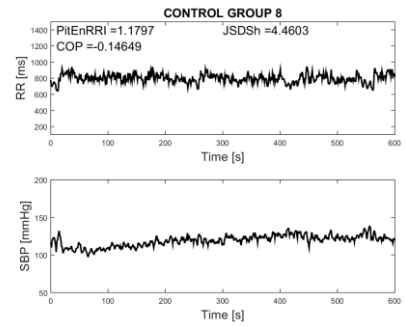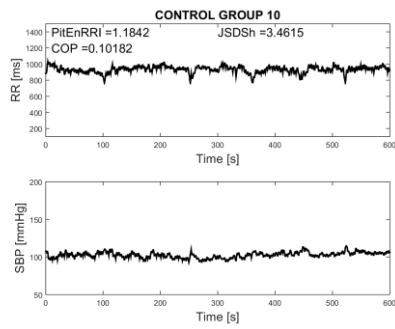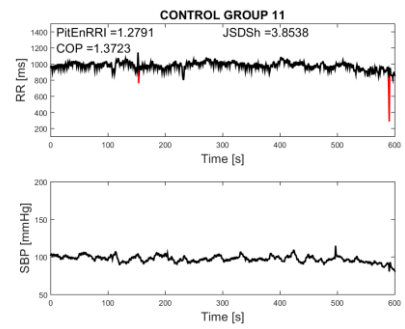

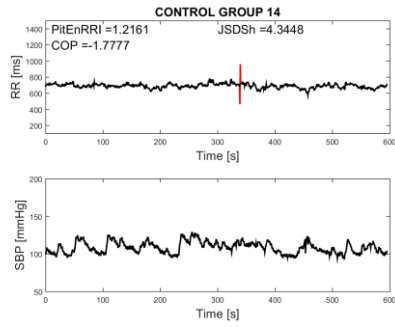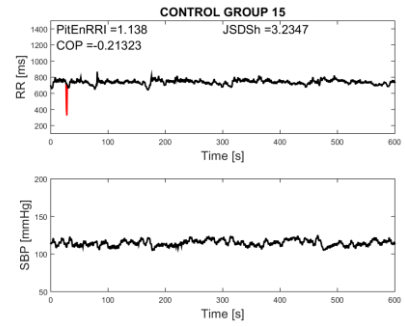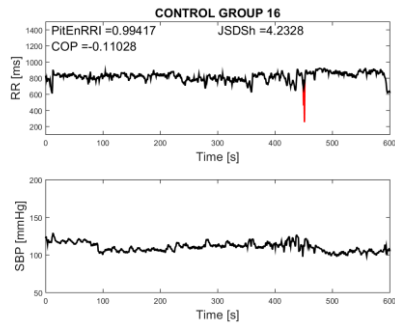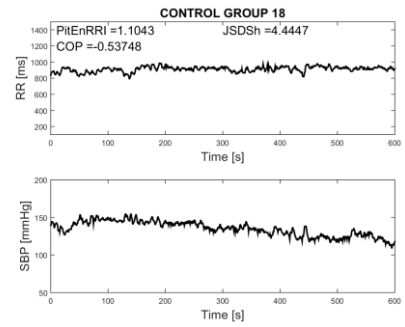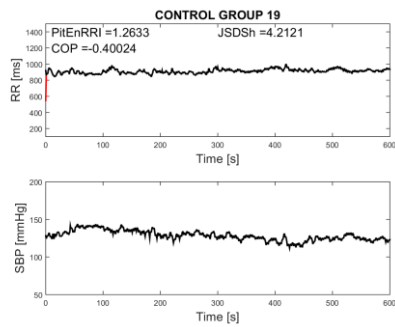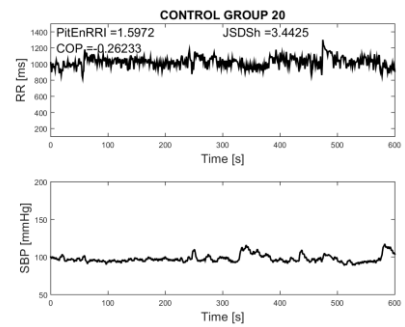

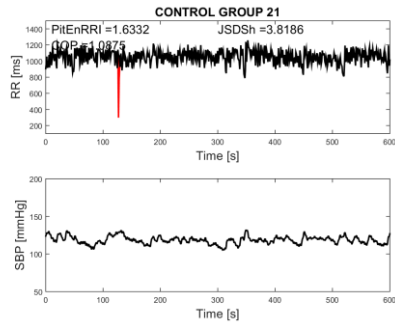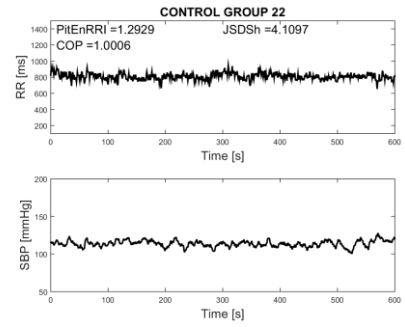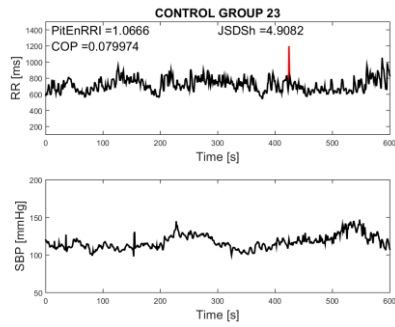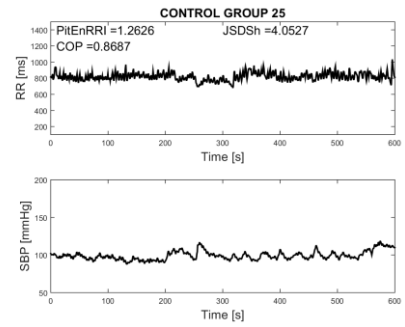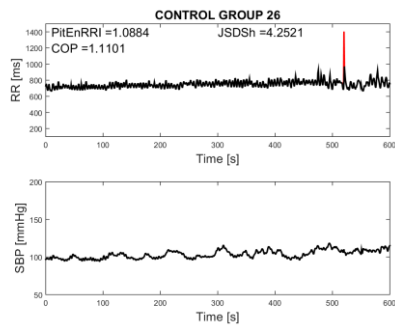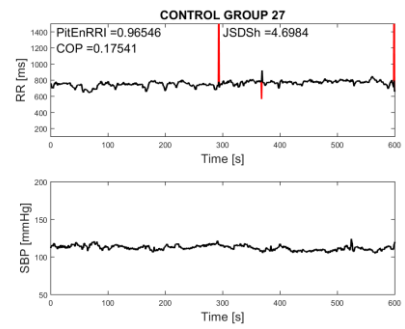

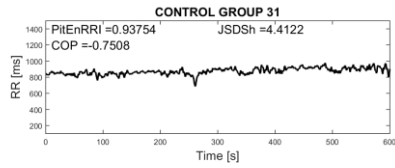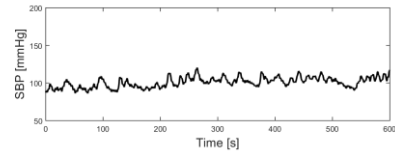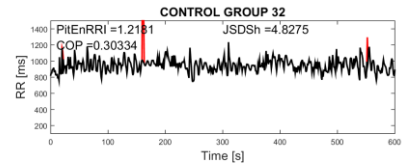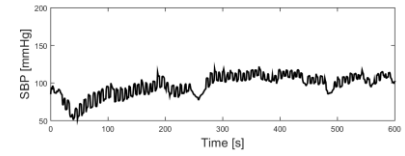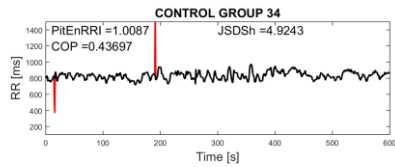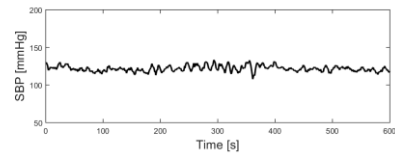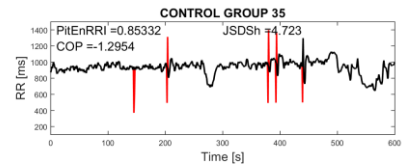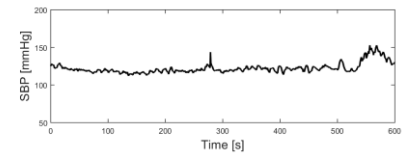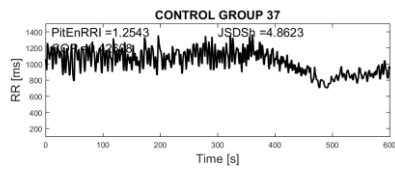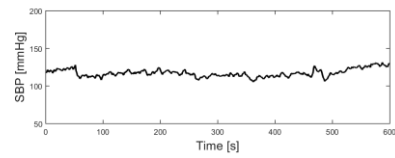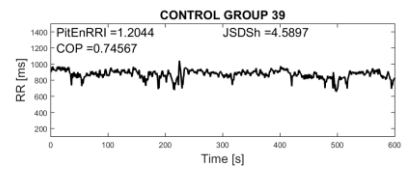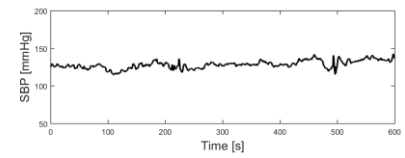

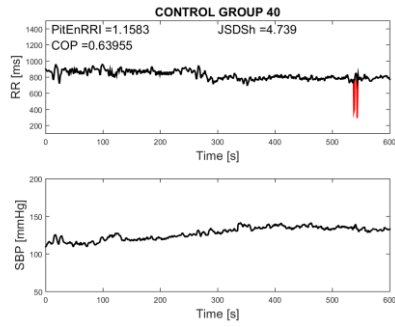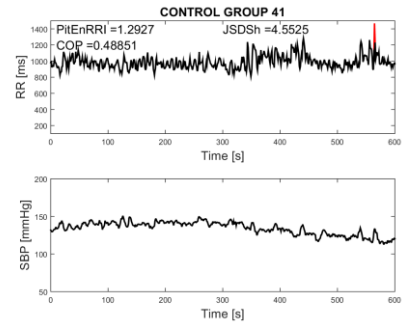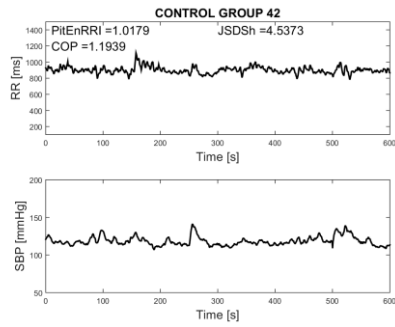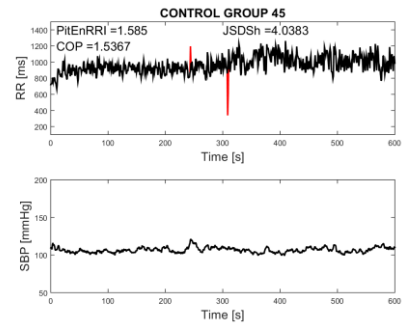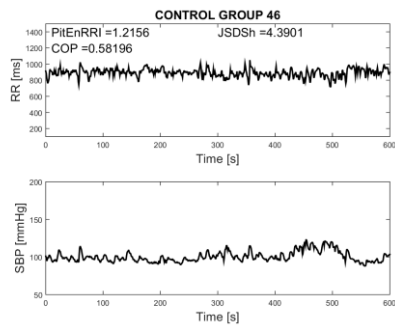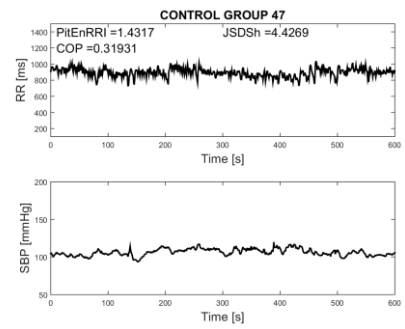

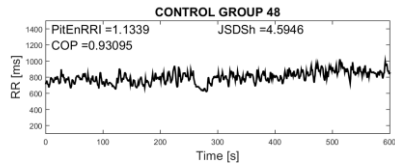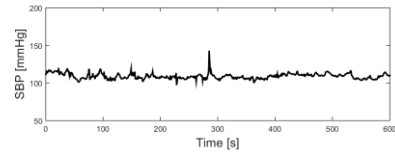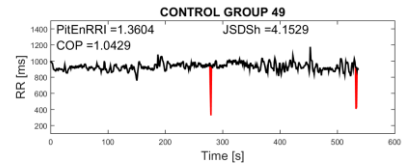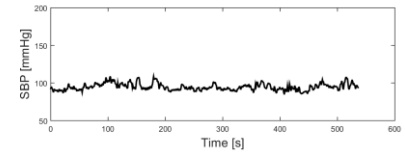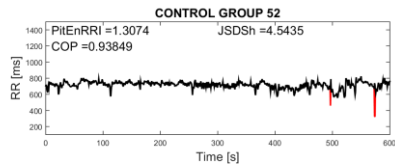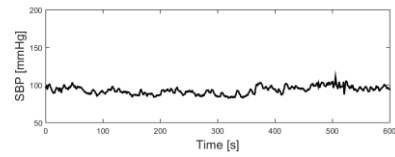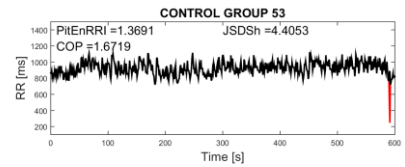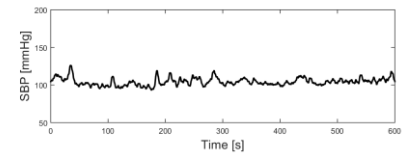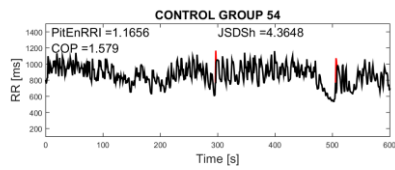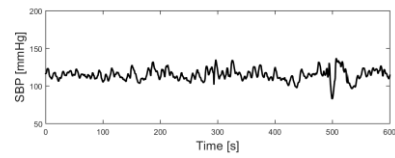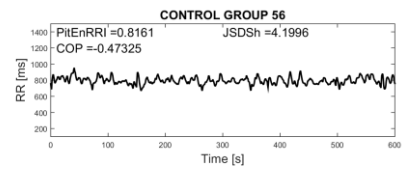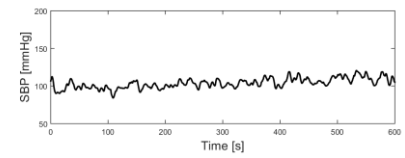

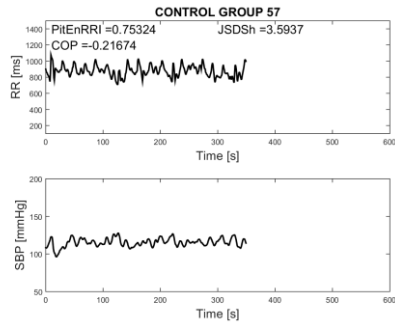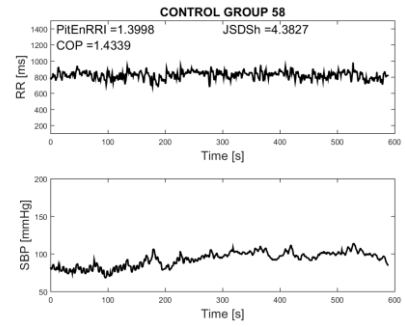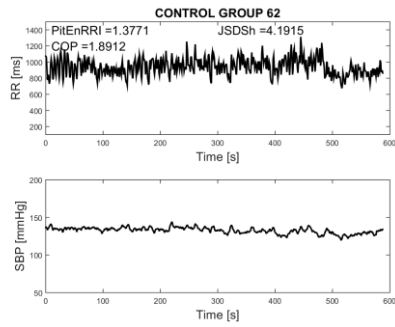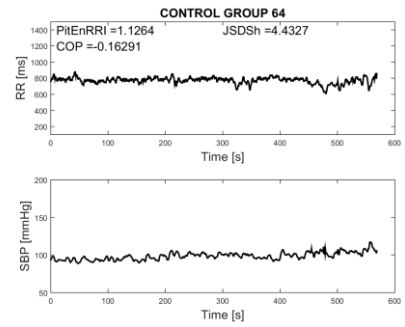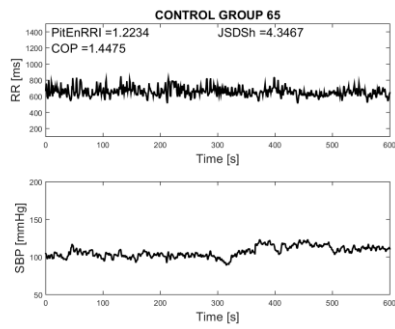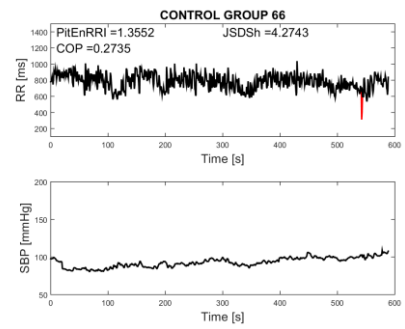

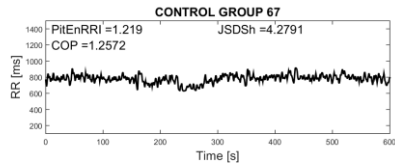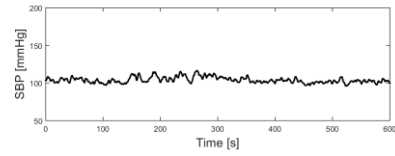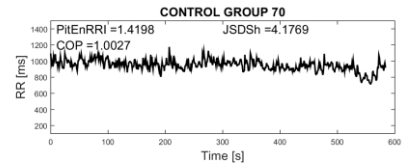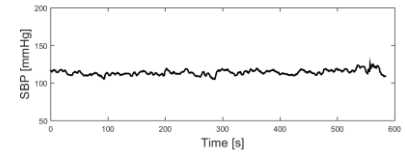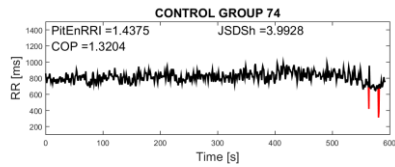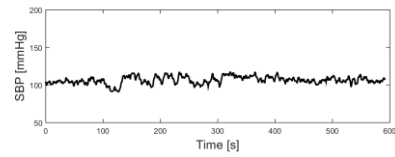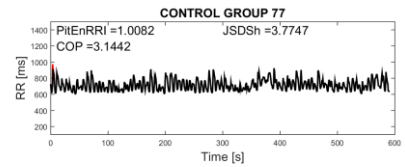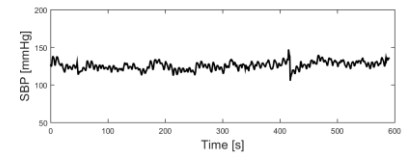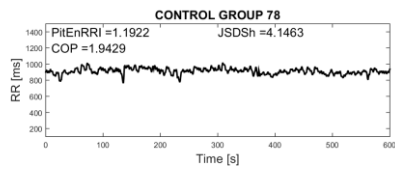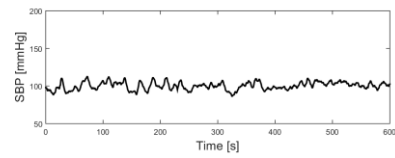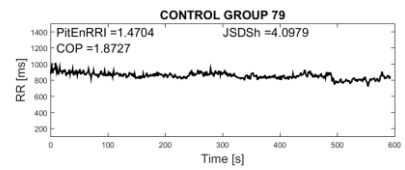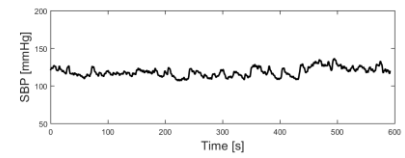

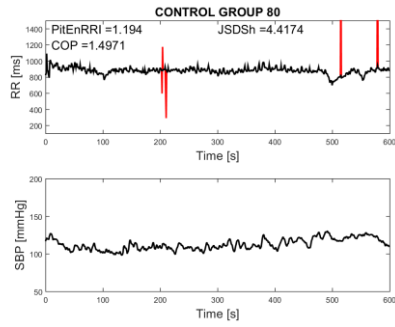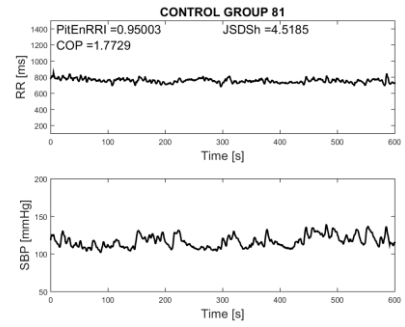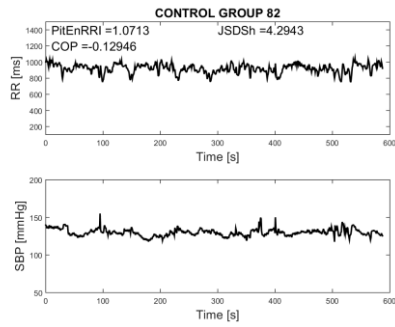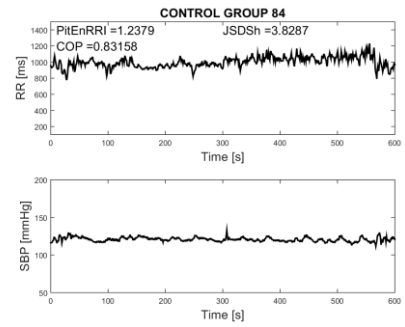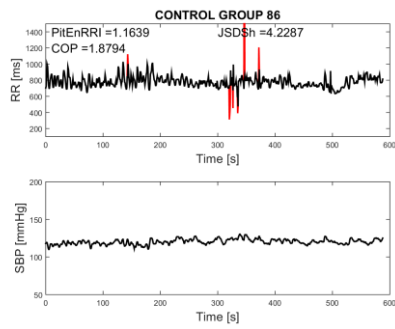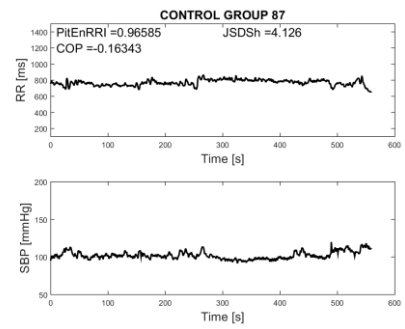

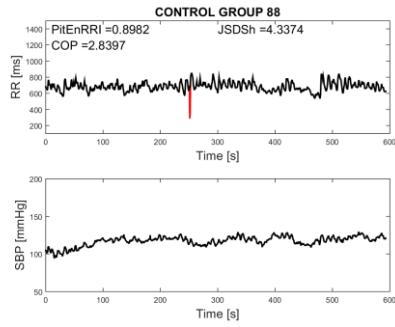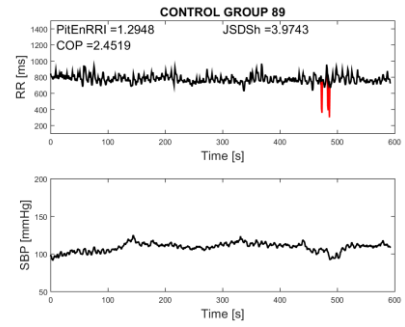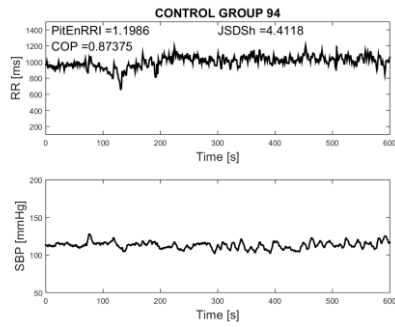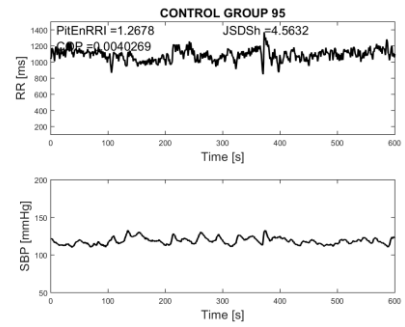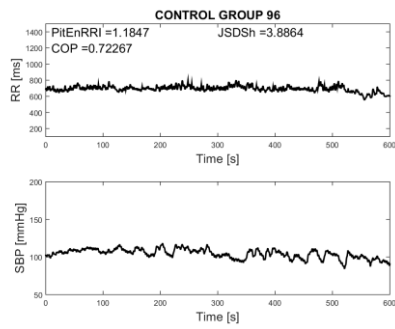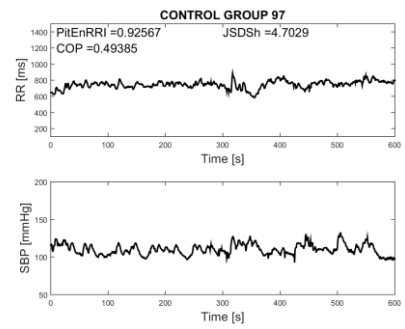

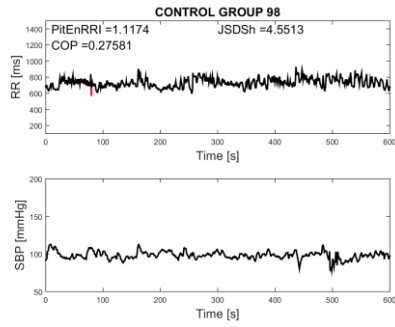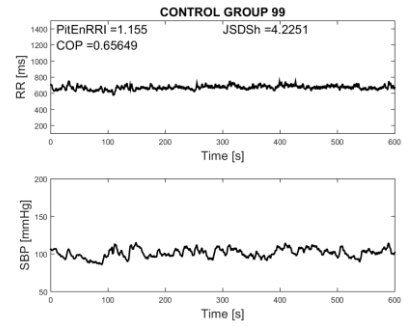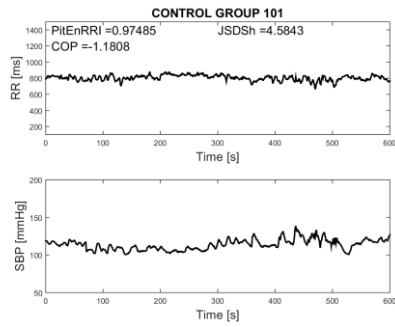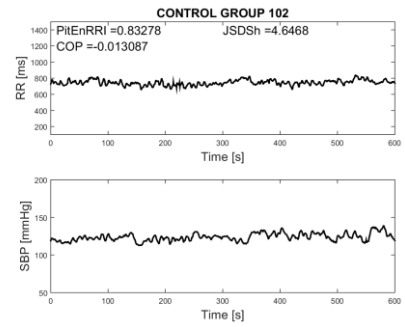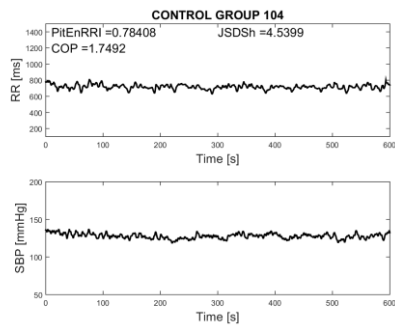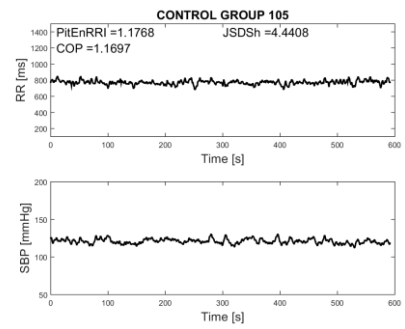

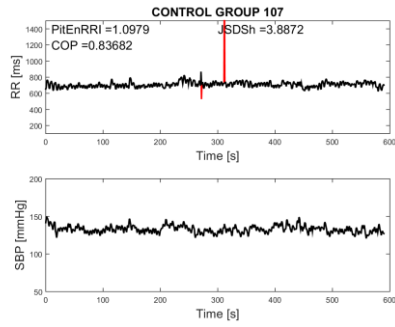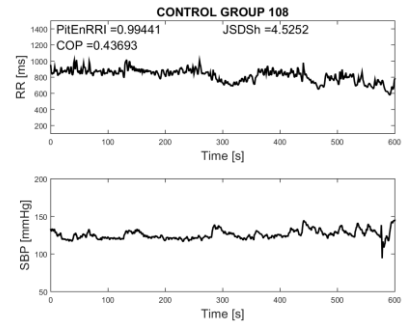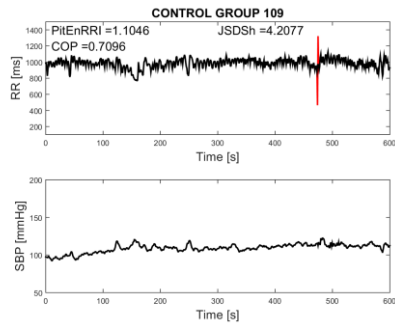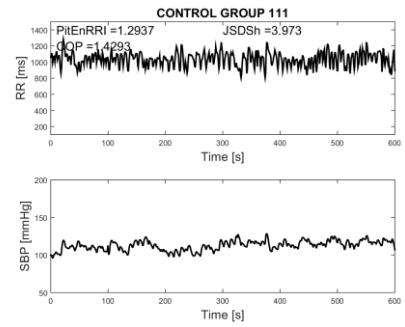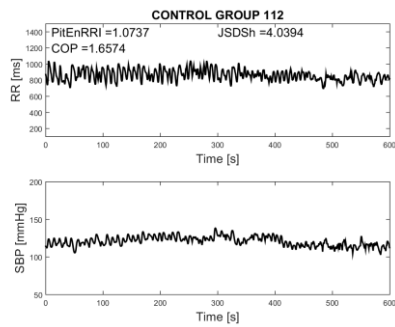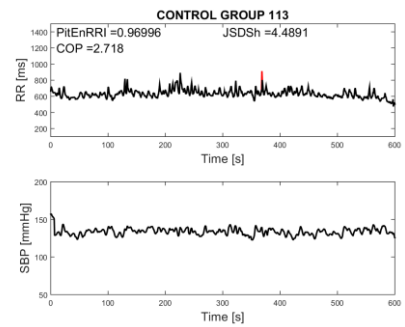

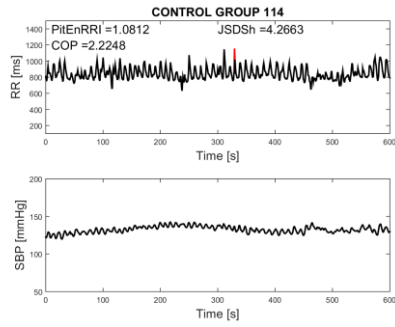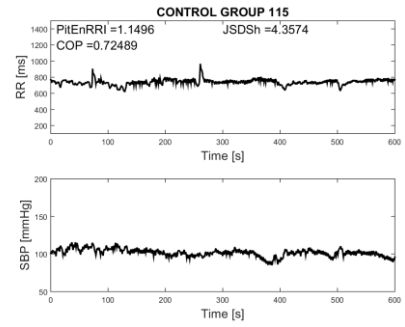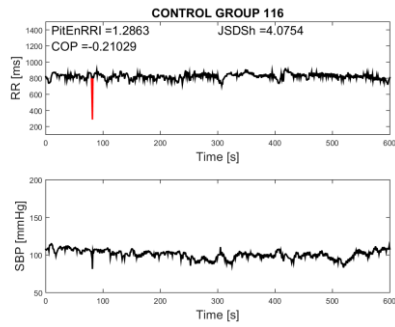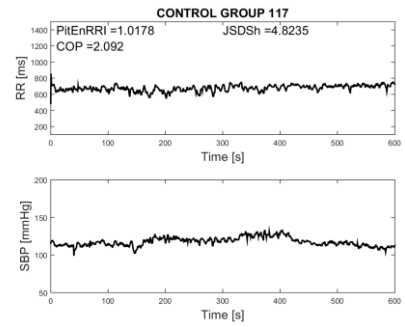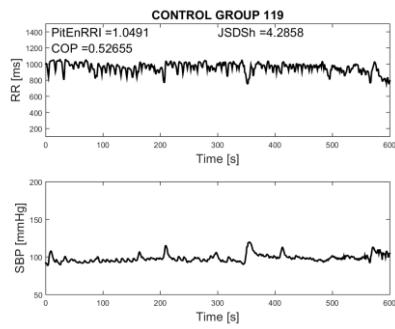

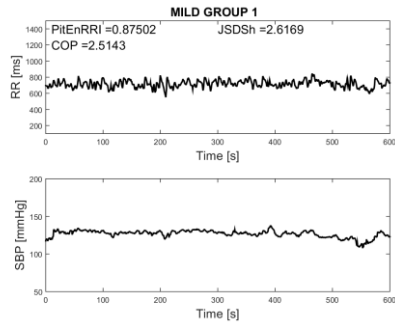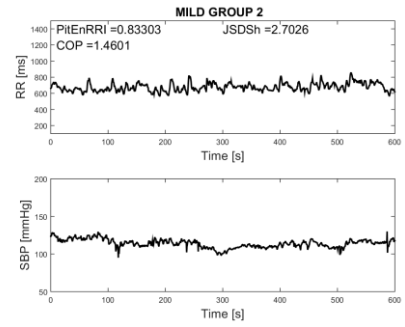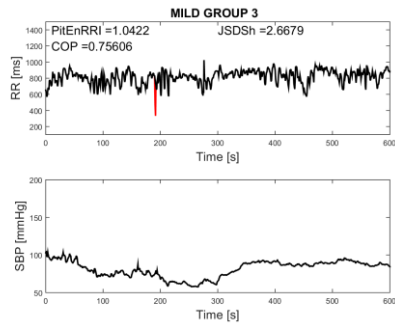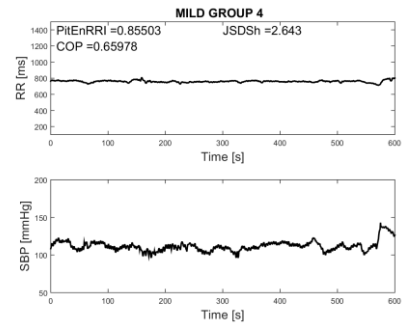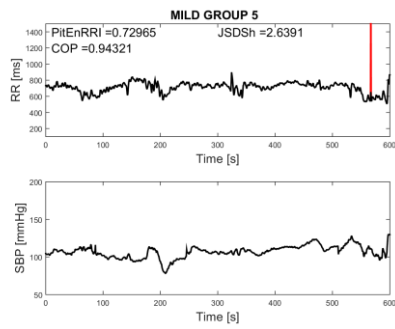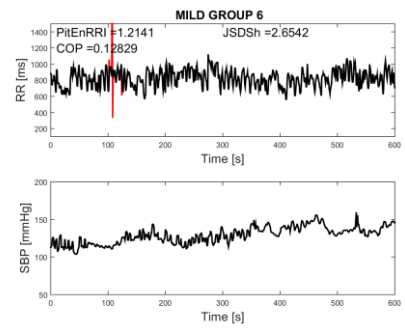

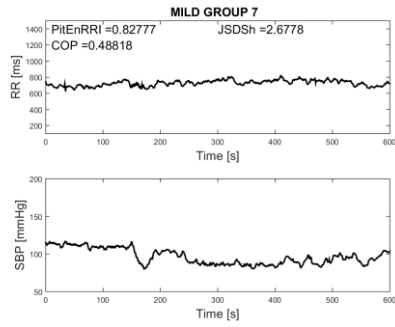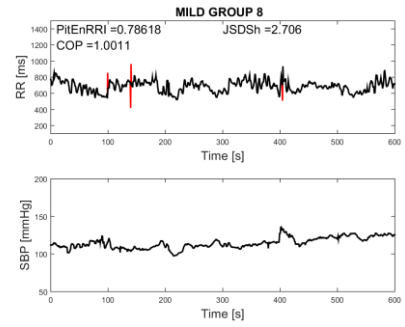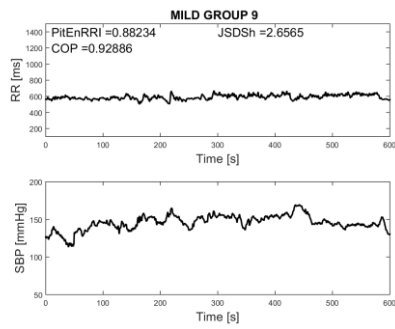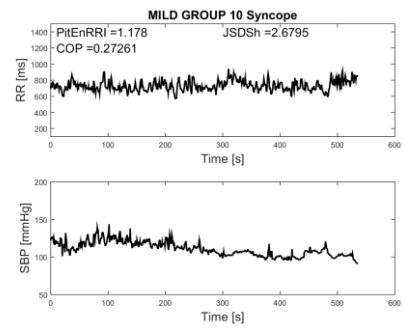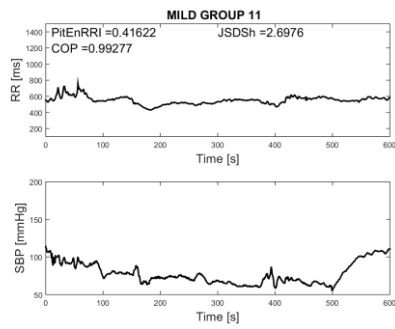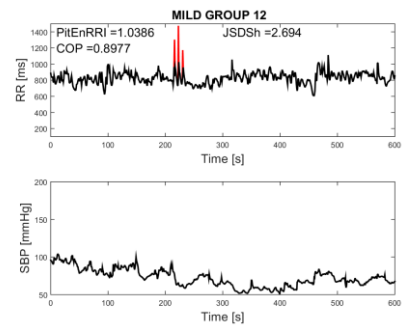

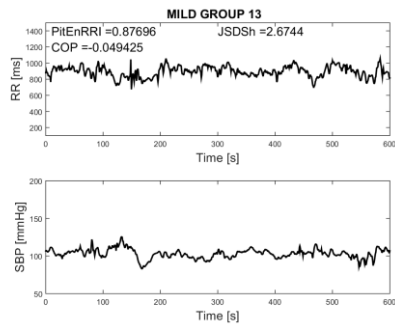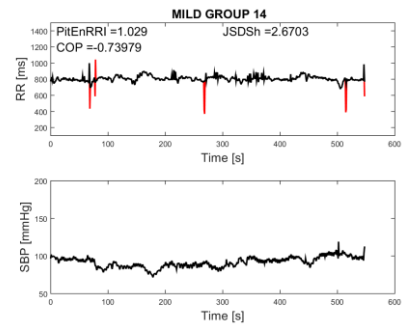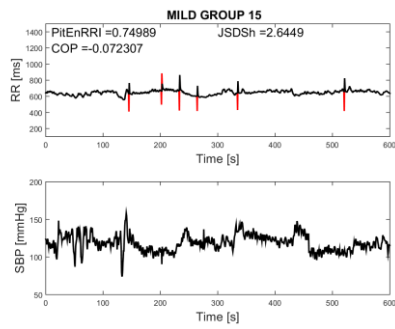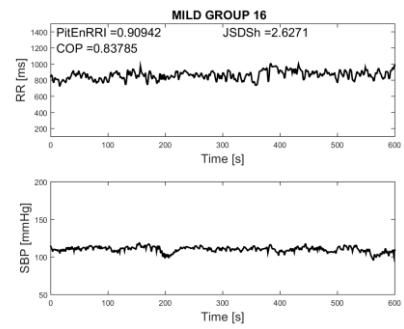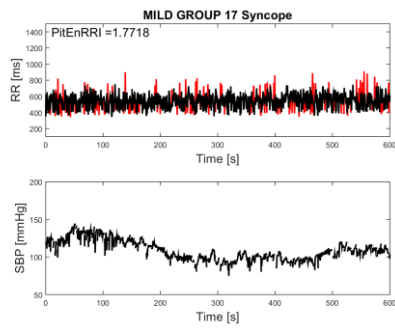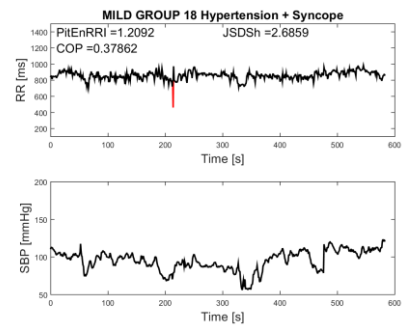

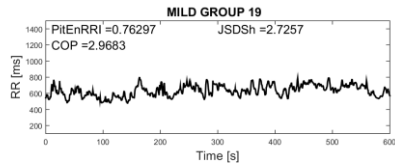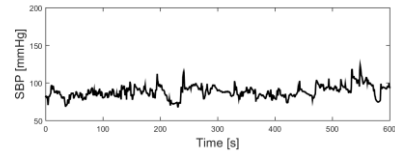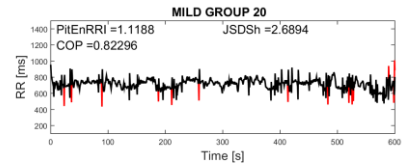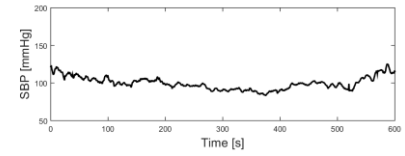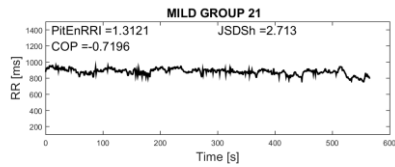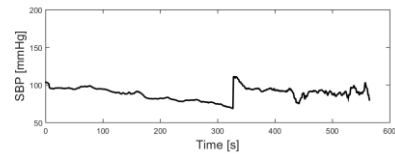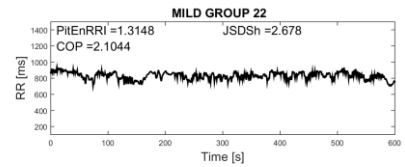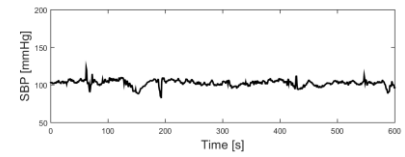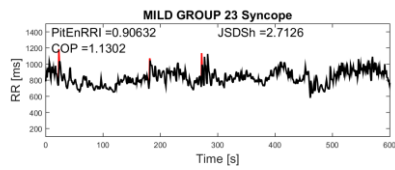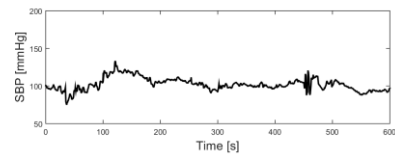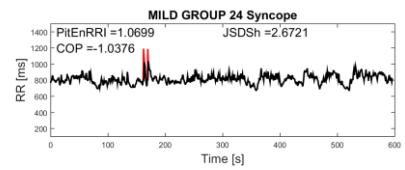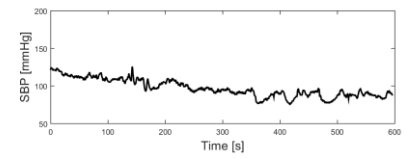

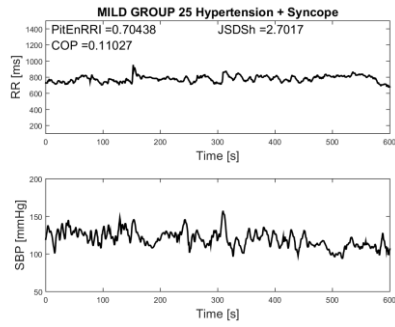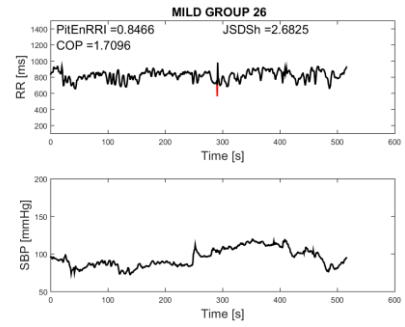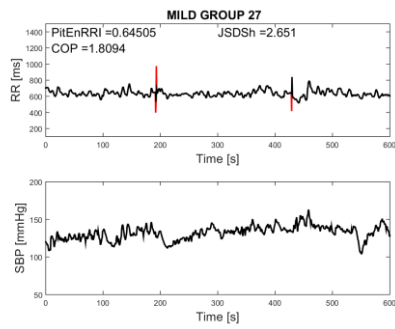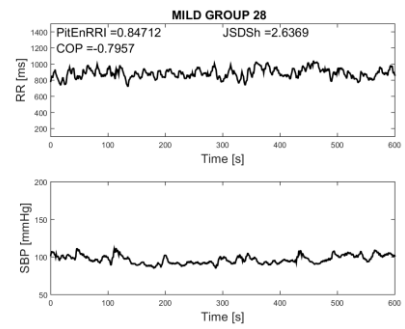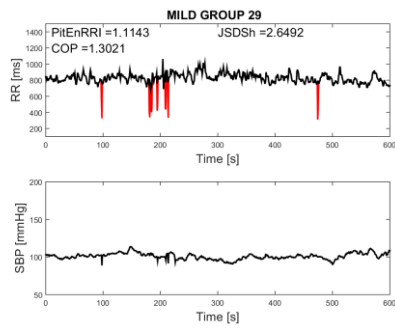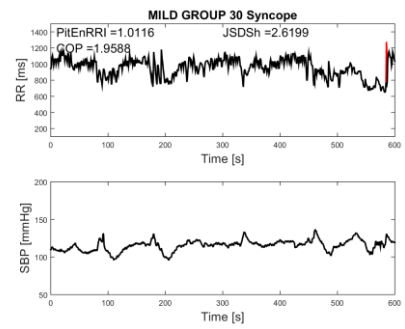

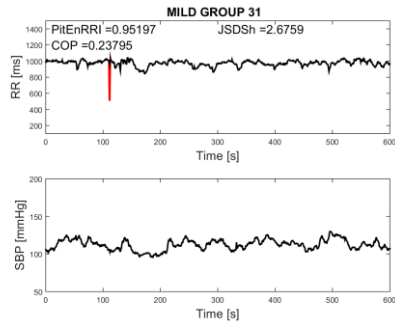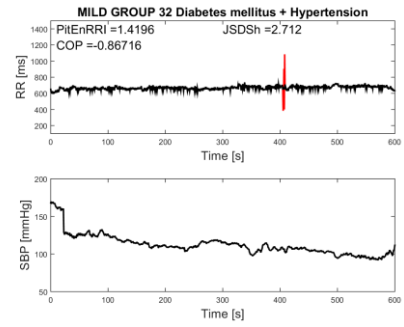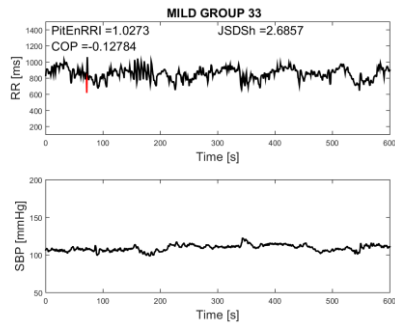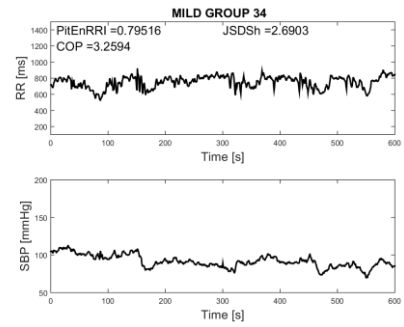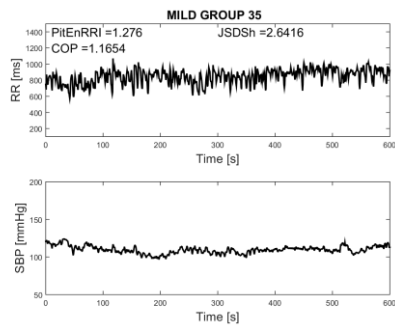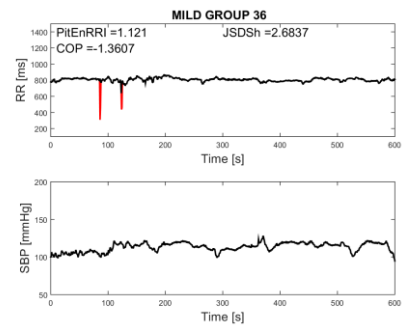

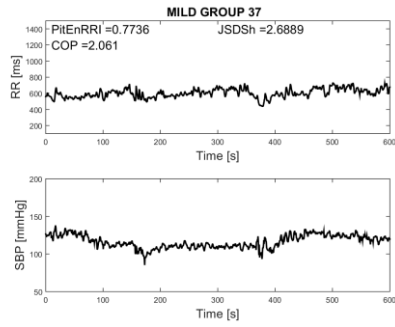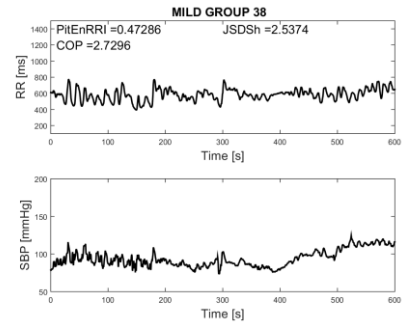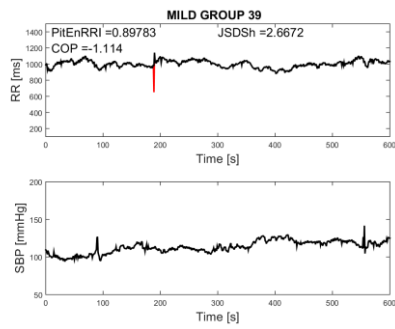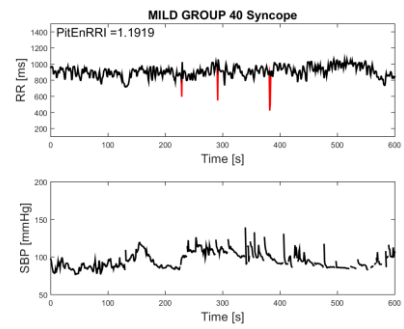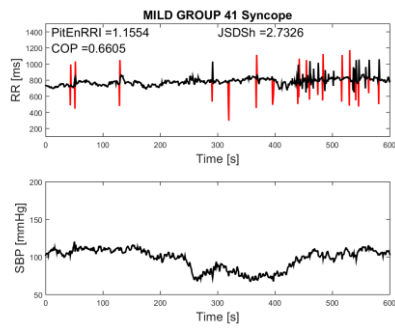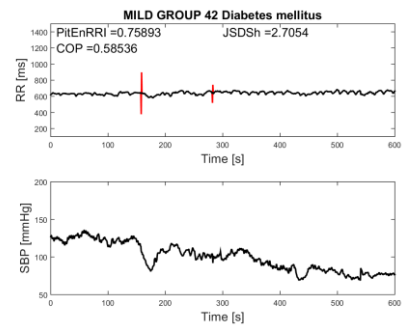

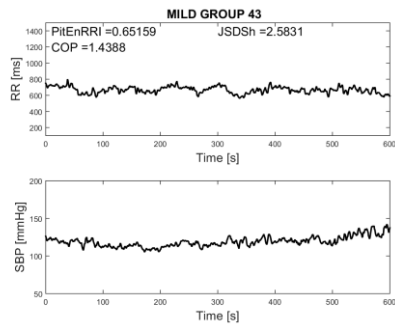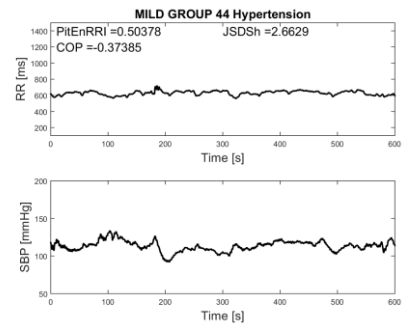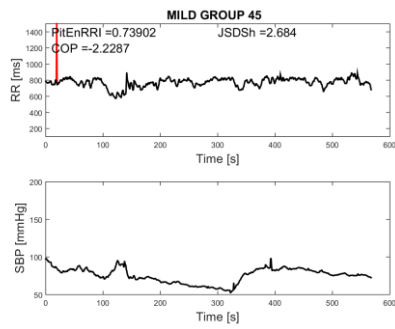

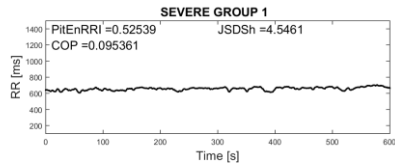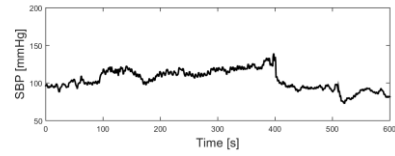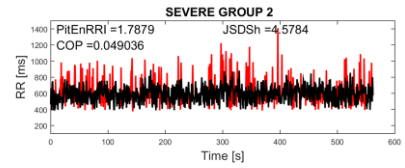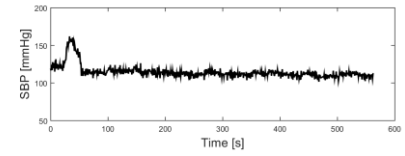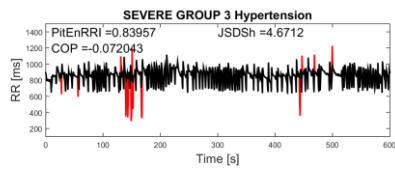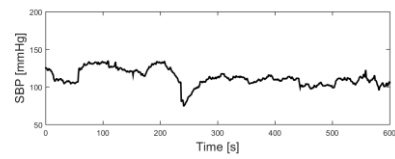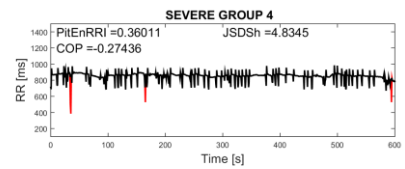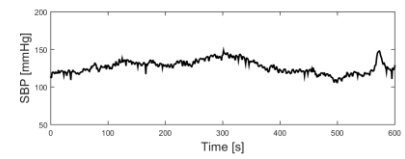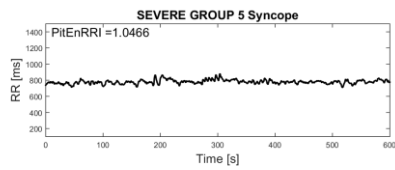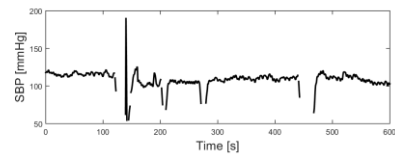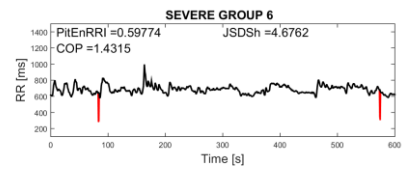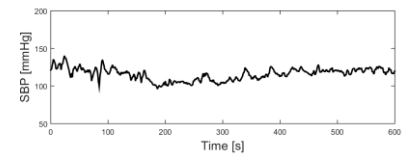

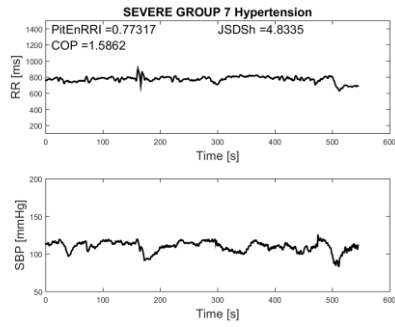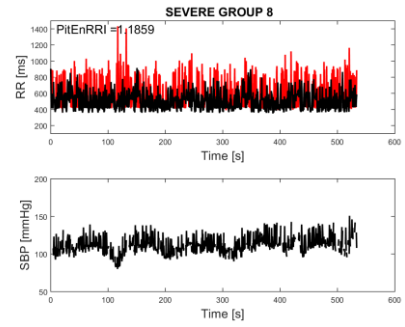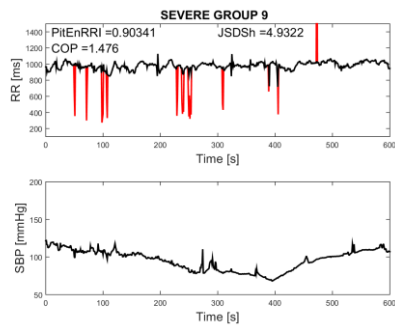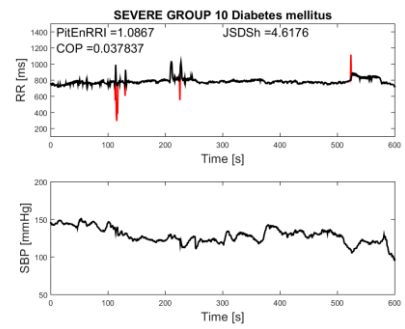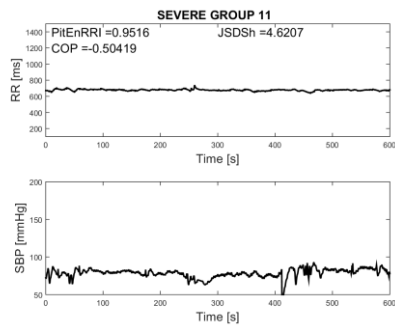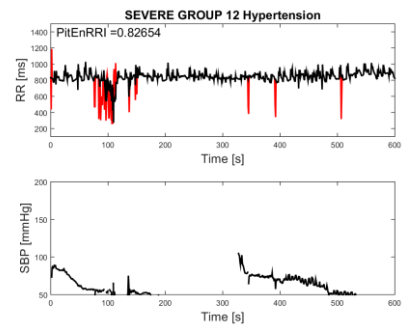

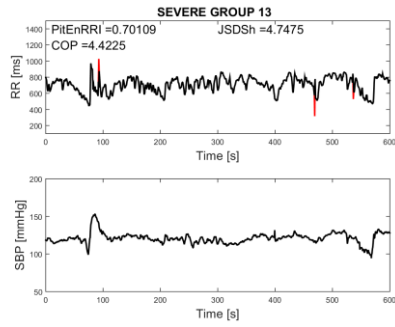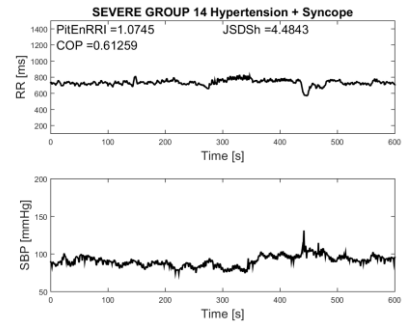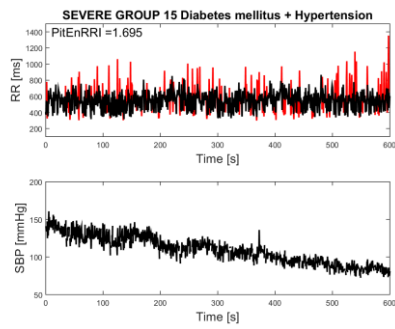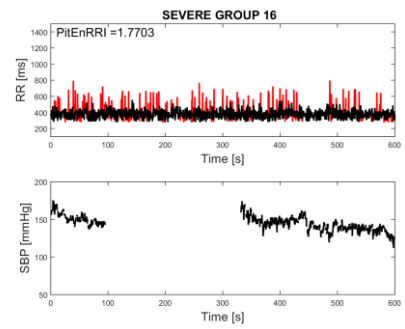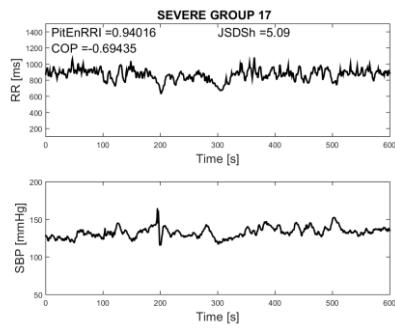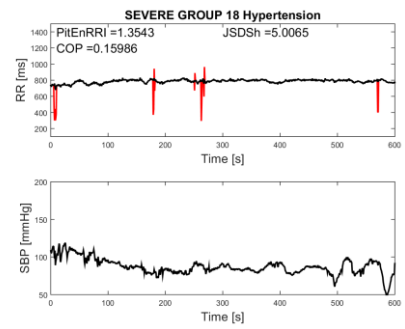

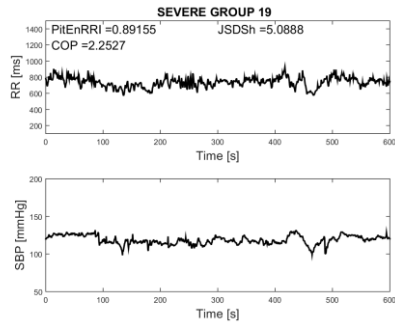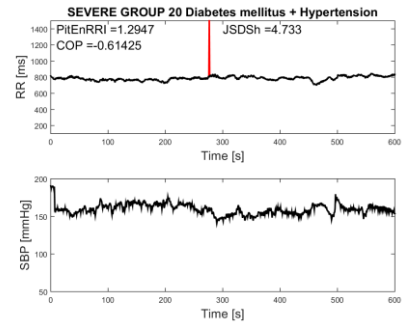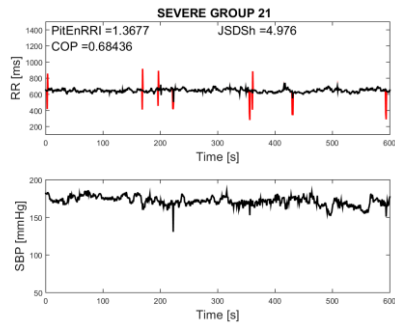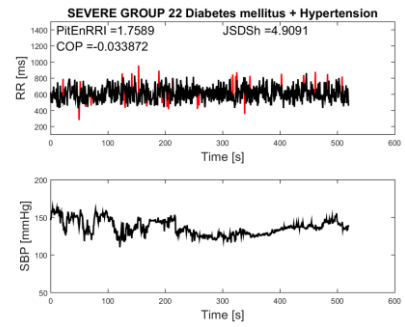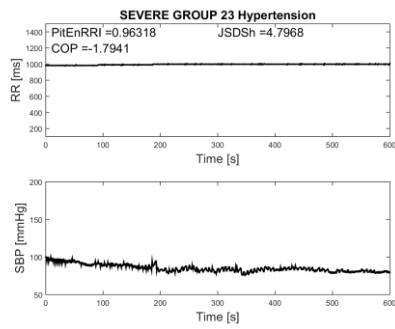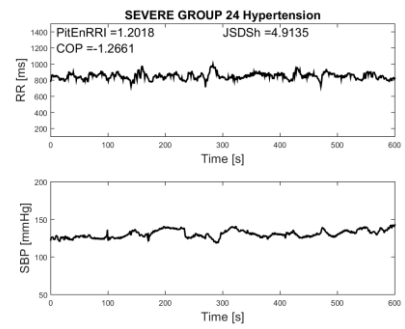

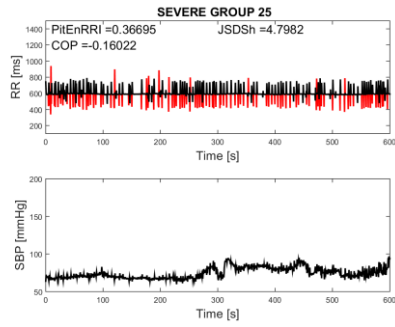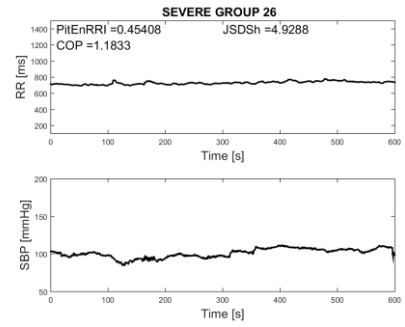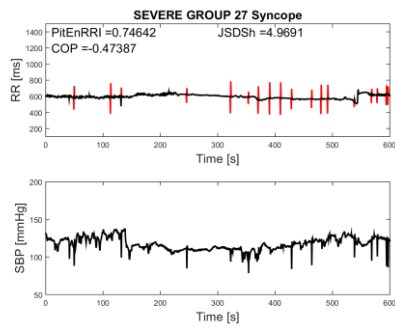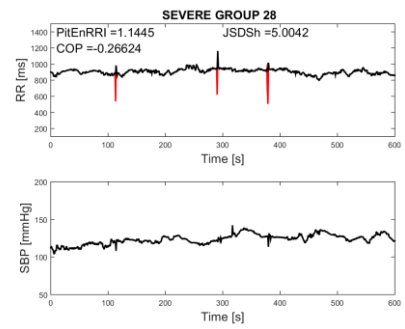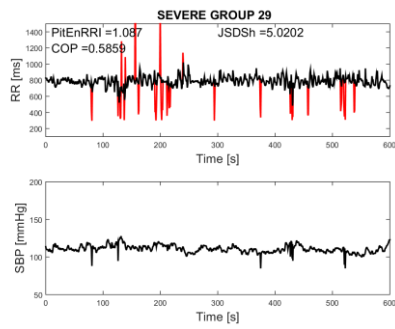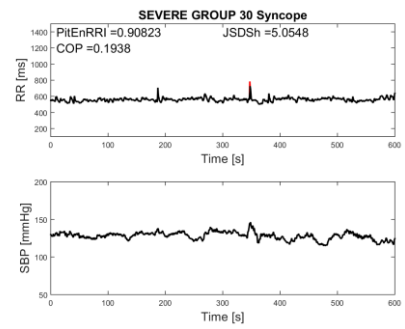

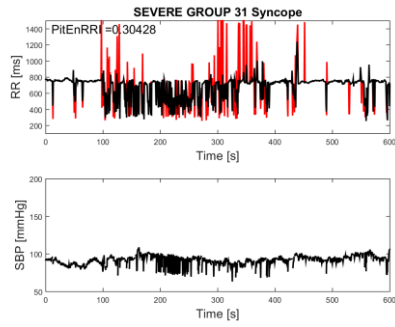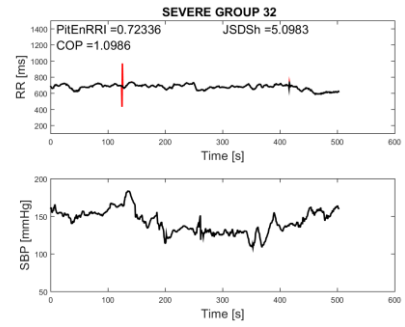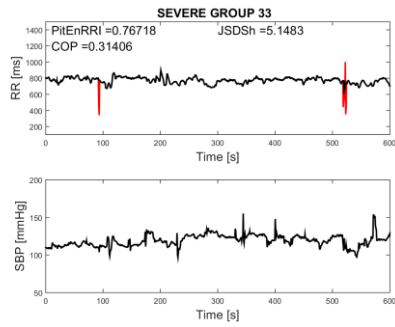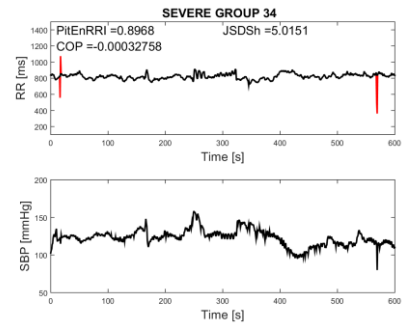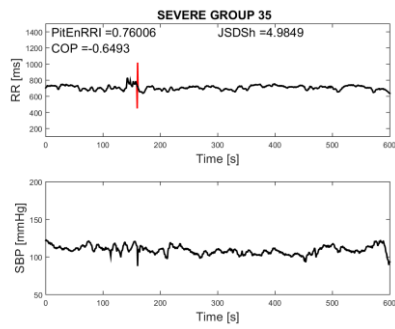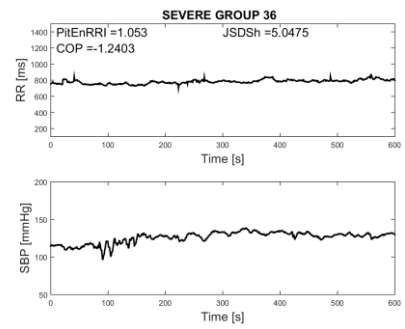

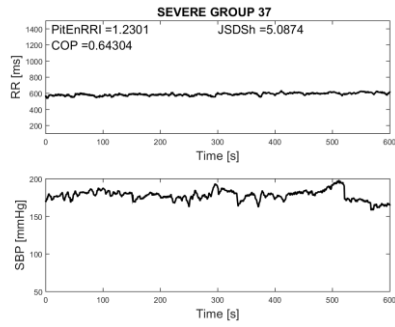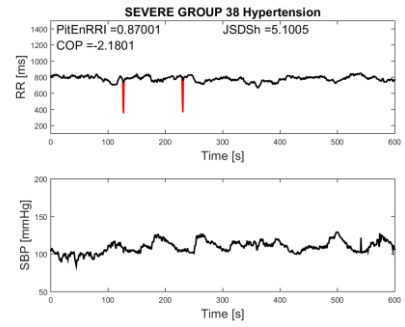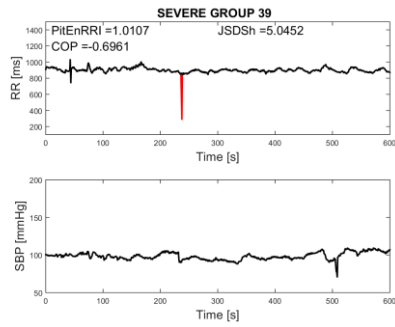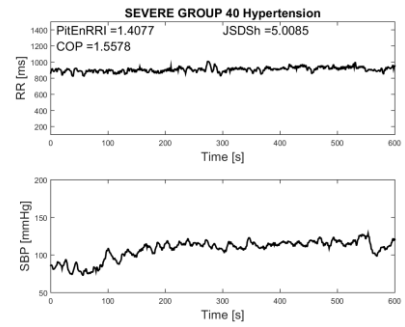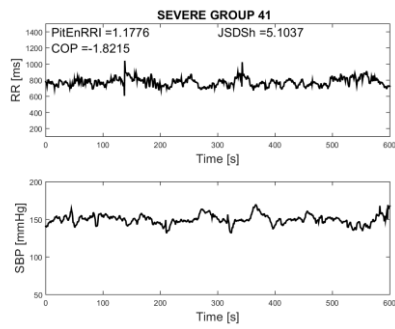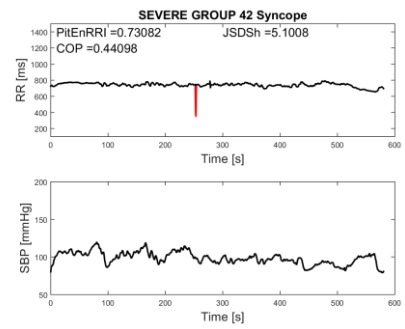

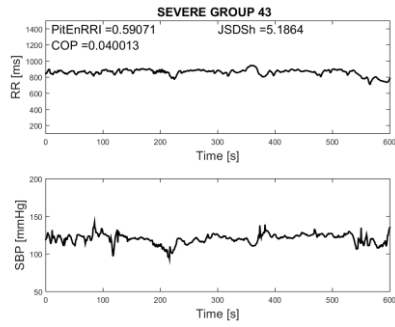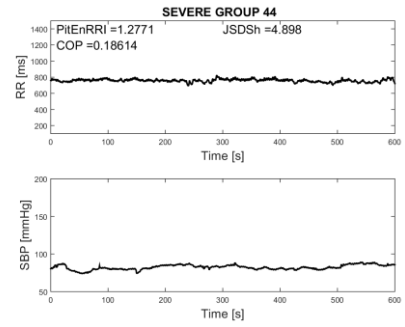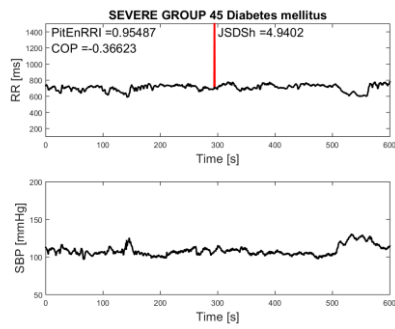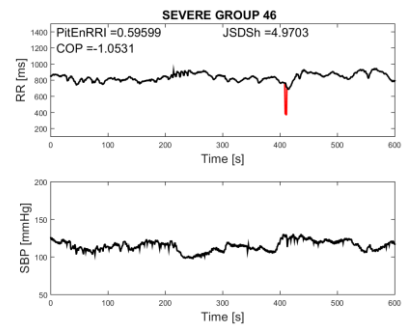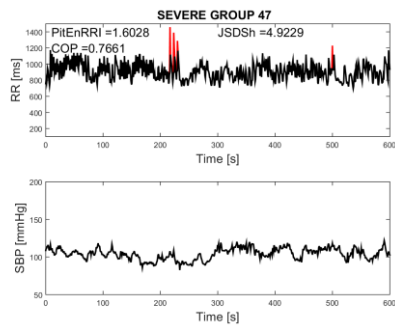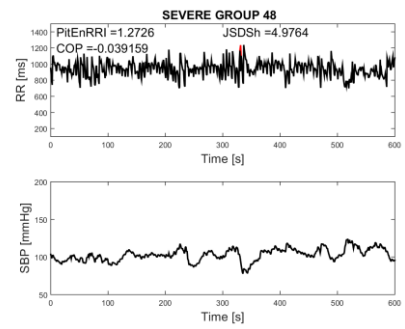

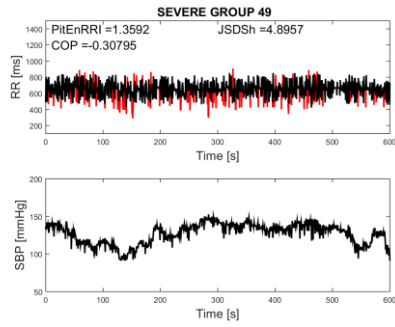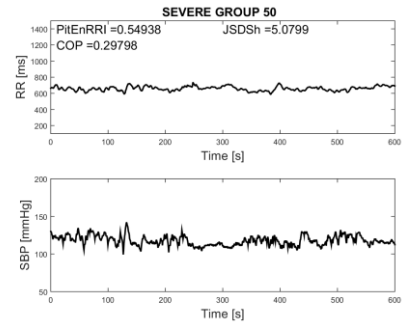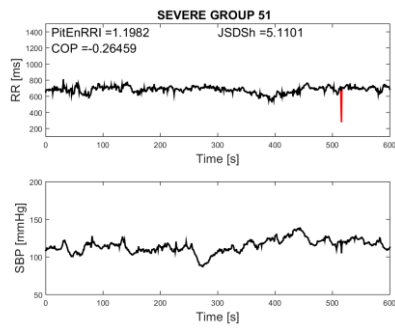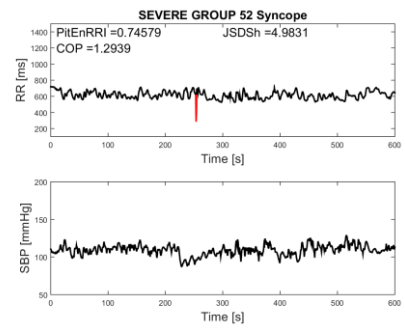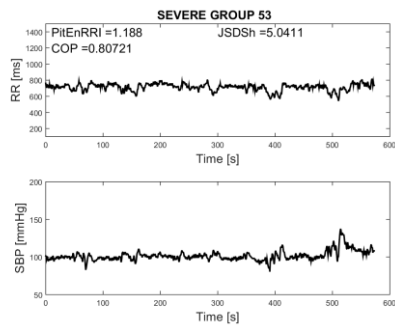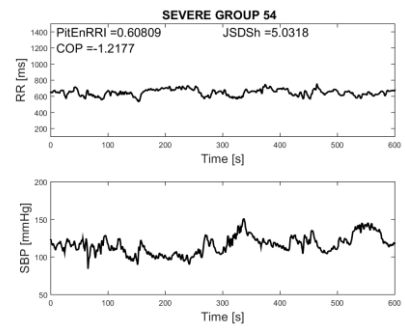

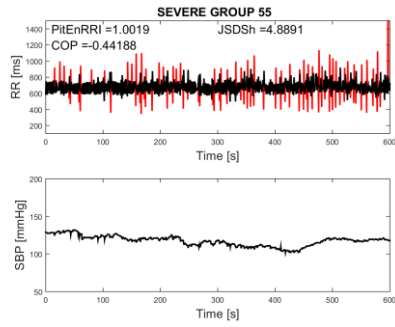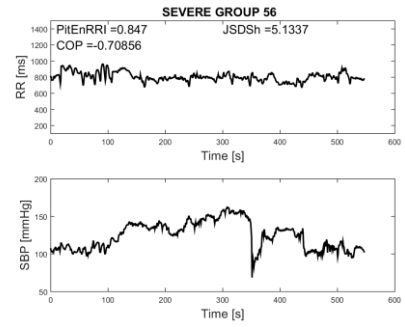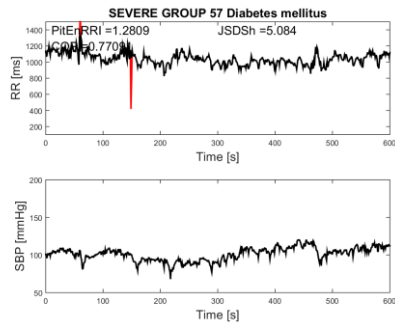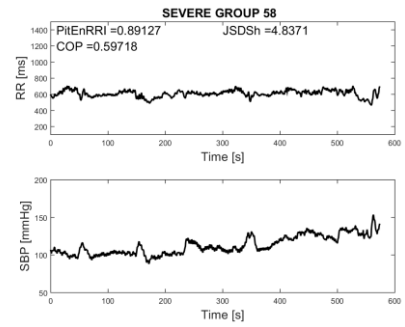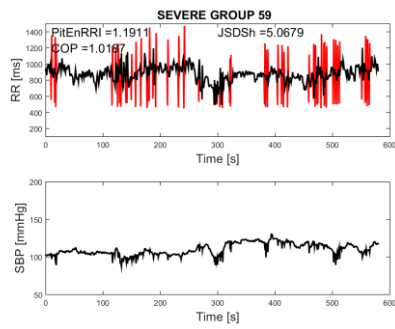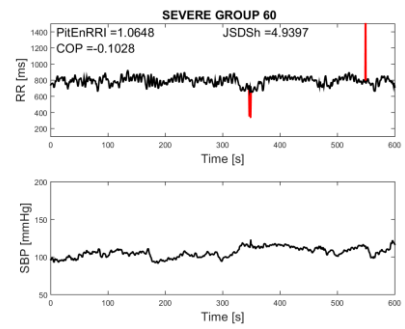

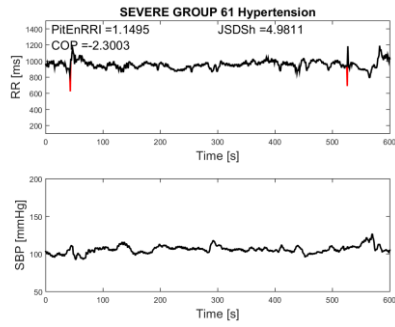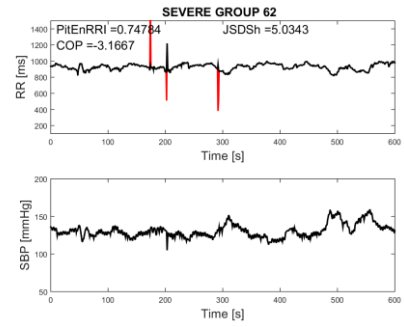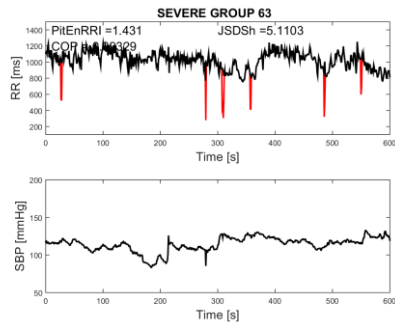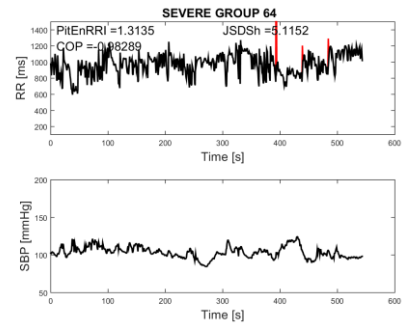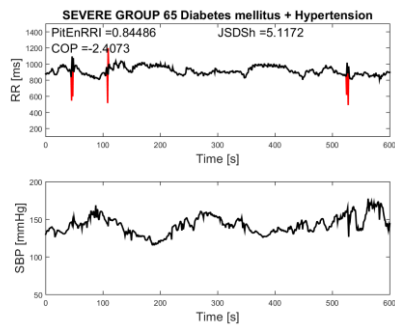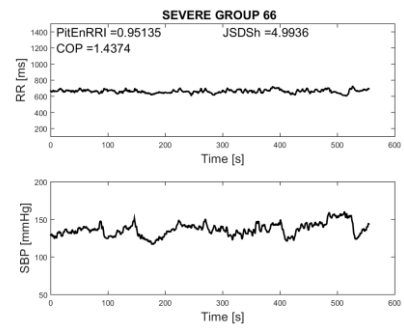

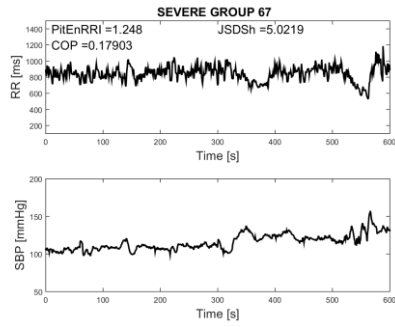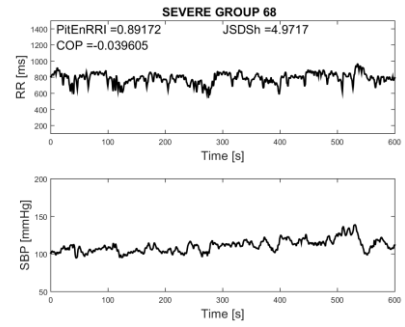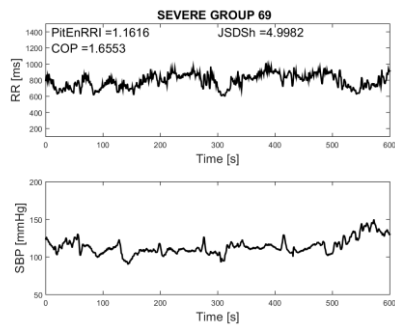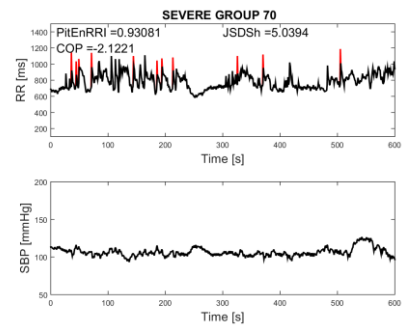

Supplement: Supplementary file 1 [file entropy-23-00087-s001.pdf]
